# Supplementary material for: Reprogramming tumor microenvironment by CAF-targeted sonodynamic therapy combined with chemotherapy
Source: Research Square preprint supplement (doi:10.21203/rs.3.rs-7340174/v1), 2025-08-29
Supplement: Supplementary file 1 [file 66a24368c2ae14da8848d68e.docx]

#### Figure supplementary

##### Figure S1


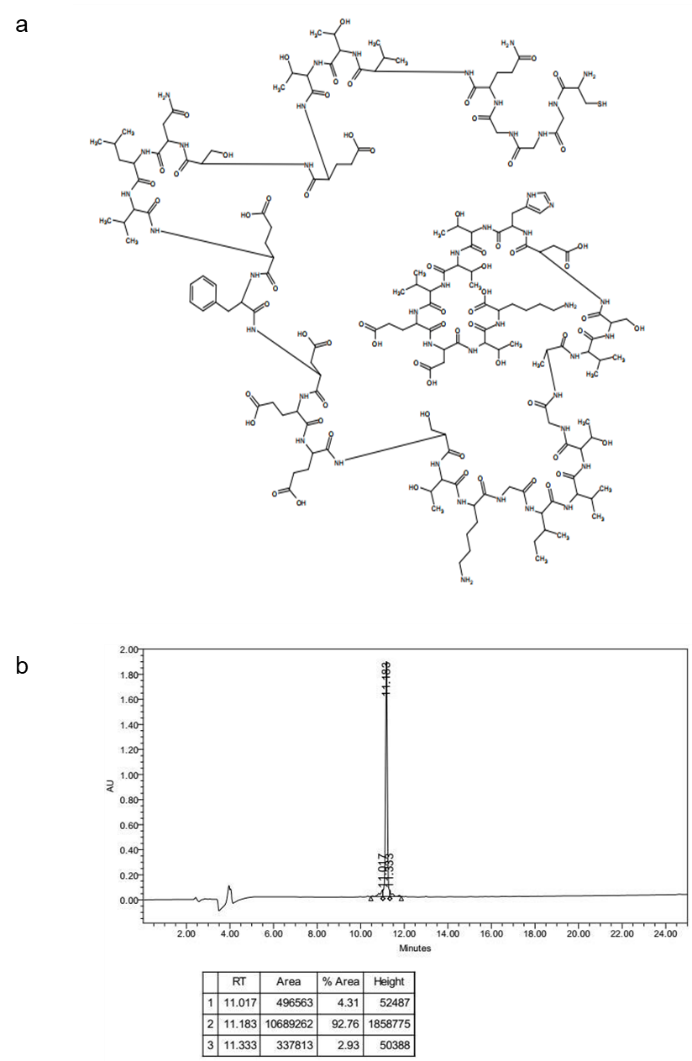


1. molecular formula of FnBPA5; (b) molecular formula of IR-CF3; (c) FnBPA5 purity measured by HPLC.

##### Figure S2


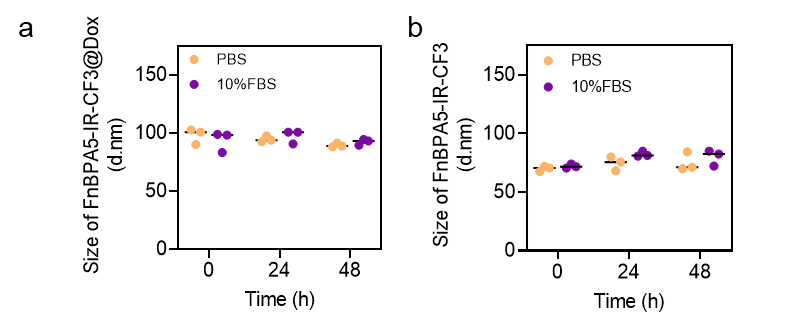


Particle size changes of FnBPA5-IR-CF3@Dox (a) and FnBPA5-IR-CF3 (b) in PBS and PBS containing 10% FBS at different time point.

##### Figure S3


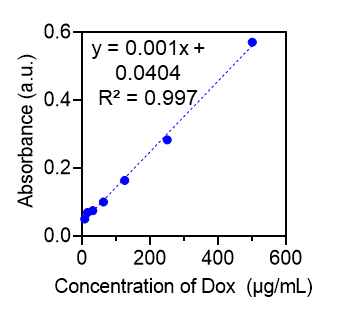


Standard Curve of Dox.

##### Figure S4


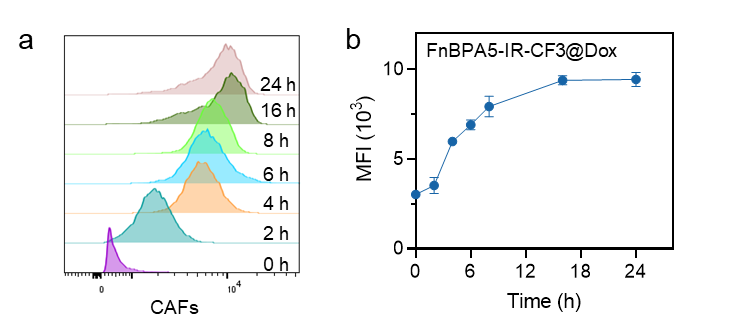


1. Flow cytometry of FnBPA5-IR-CF3@Dox uptake by CAFs at different time points; (b) quantitative analysis curve of Dox-related MFI, n=3.

##### Figure S5

Cytotoxicity of FnBPA5-IR-CF3 on CAFs at different concentrations.

##### Figure S6


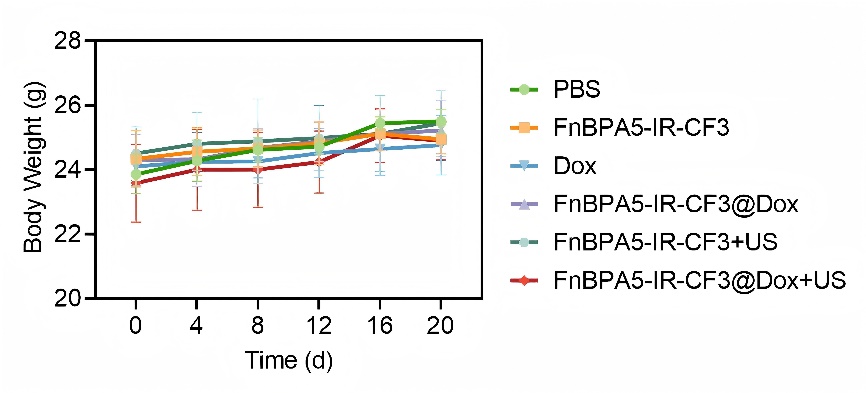


The time-dependent weight change curves of mice in different treatment groups during the treatment period, n=5.

##### Figure S7


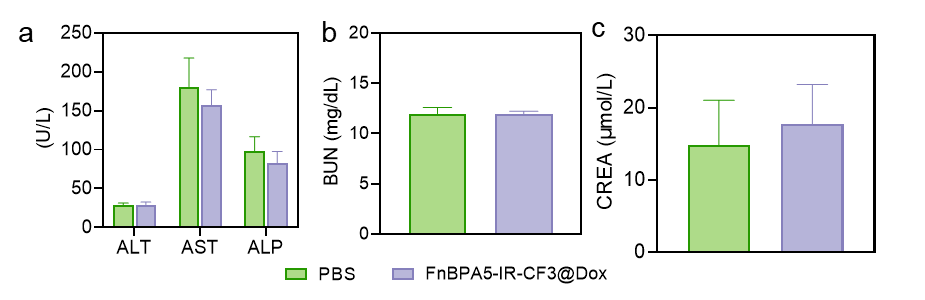


Serum levels of ALT, AST, ALP, CREA, and BUN in mice at the end of treatment. n=5.

##### Figure S8


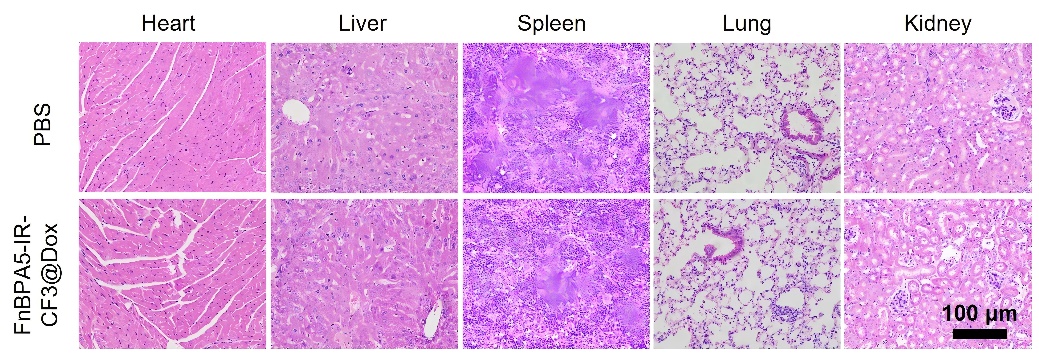


H&E staining of major organs in mice
